# Supplementary material for: Restorative effects of (+)-epicatechin in a rodent model of aging induced muscle atrophy: underlying mechanisms
Source: Royal Society of Chemistry journal article supplement (doi:10.1039/d3fo04004f), 2024-01-01

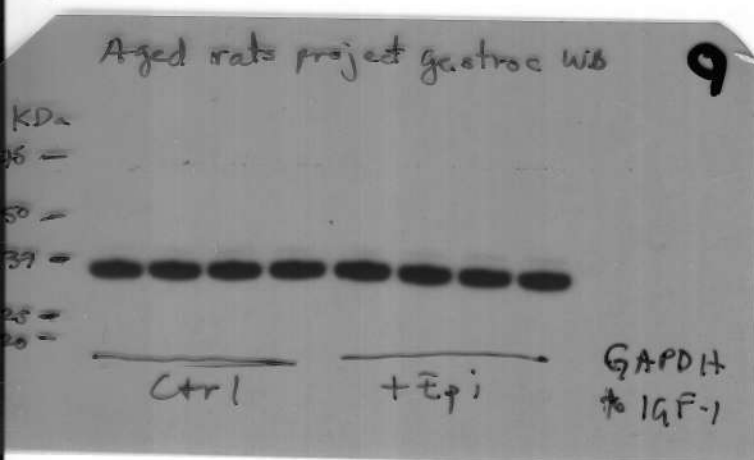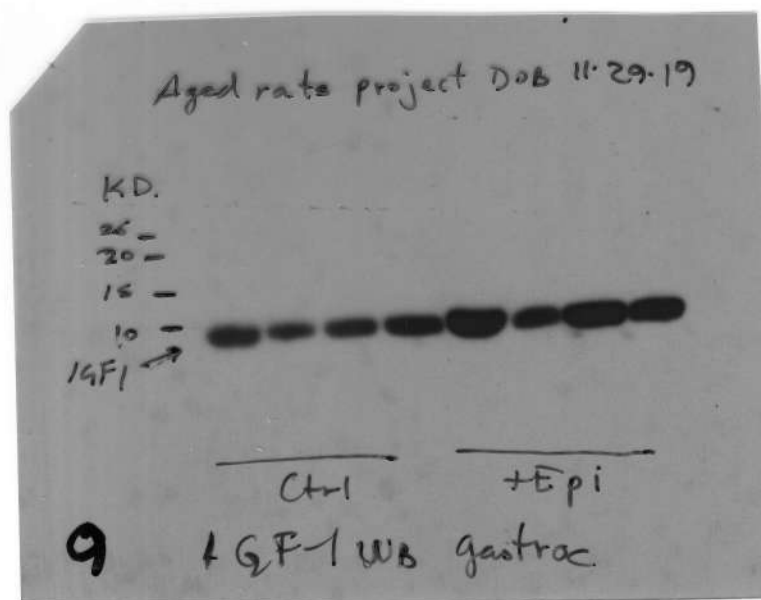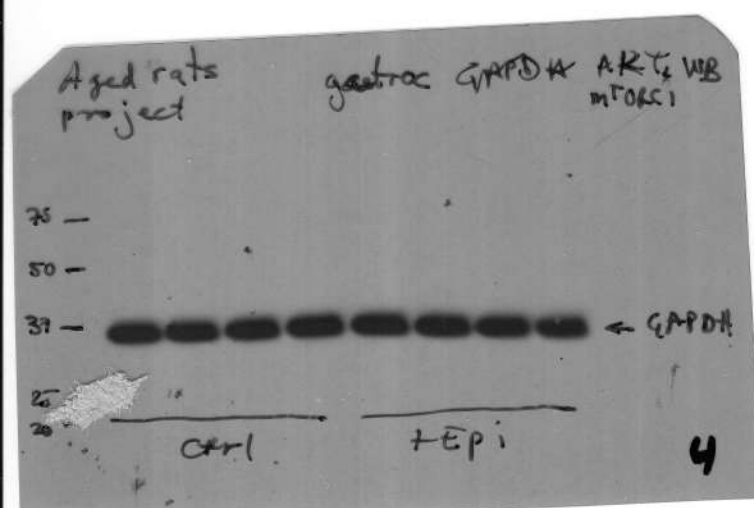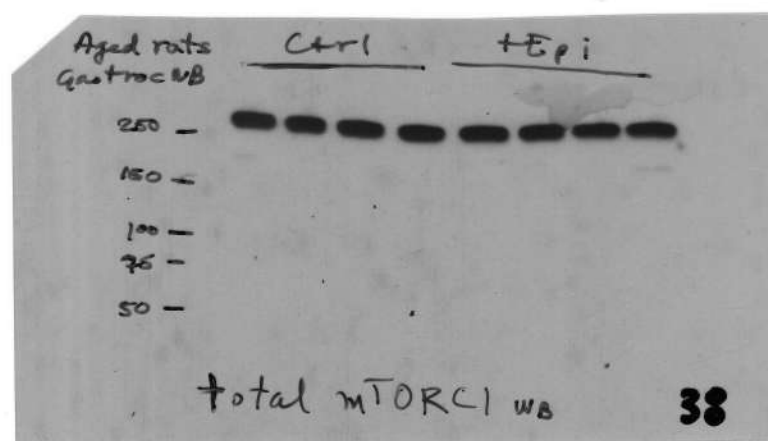

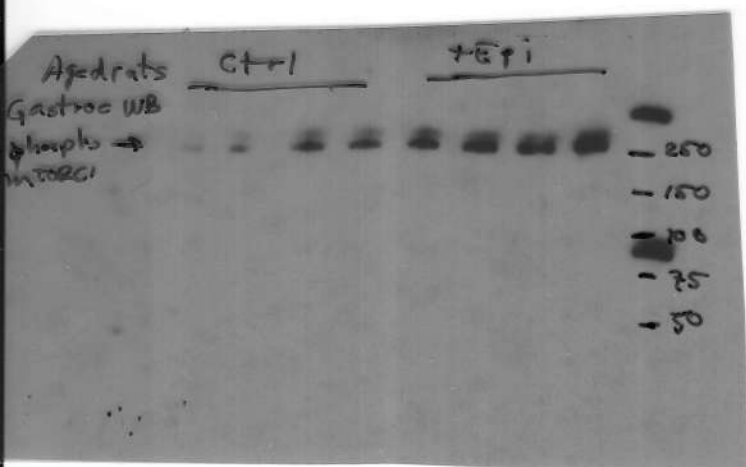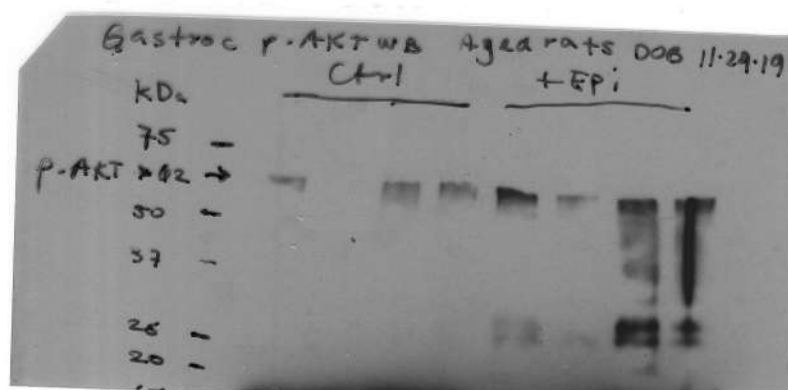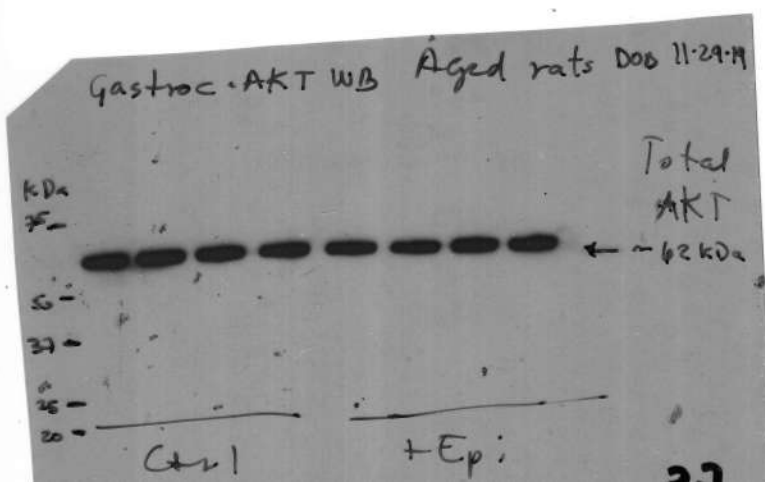

Follistatin WB Aged rats DOB 11-29-19

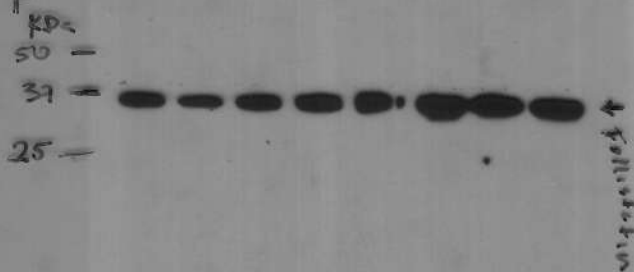

Ctrl +Epi  
Gastroc WB

38

Aged rats project DOB 11-29-19

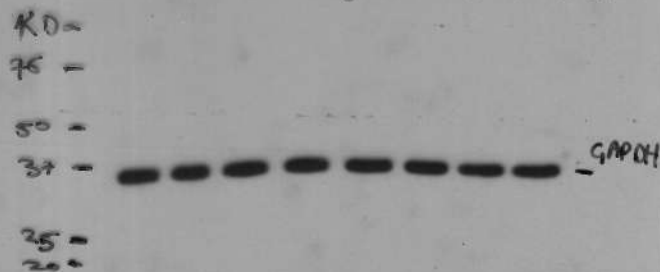

Ctrl +Epi

Aged rats project DOB 11-29-19

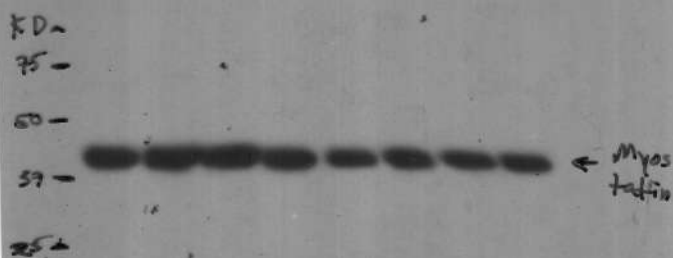

Ctrl +Epi  
Myostatin WB Gastroc

4

phospho smad 2/3 WB

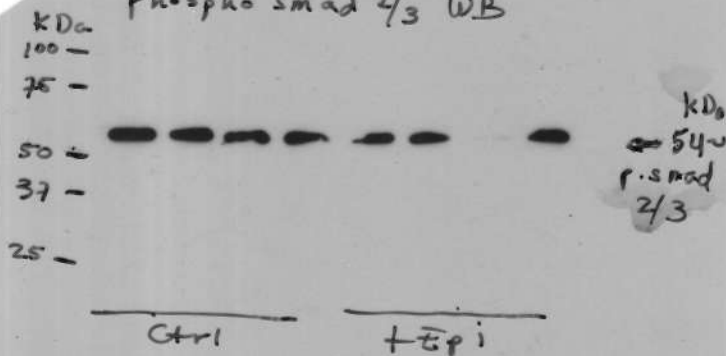

Ctrl +Epi

Aged rats project gastroc WB

Aged rats project DOB 11.29.19  
TNF- $\alpha$  WB gastroc

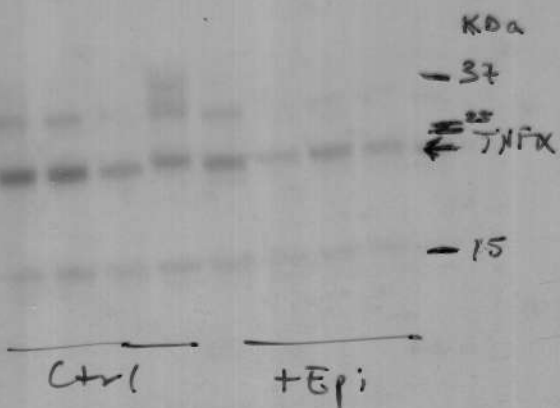

Aged rats gastroc DOB 06.07.22  
Ctrl      +Epi

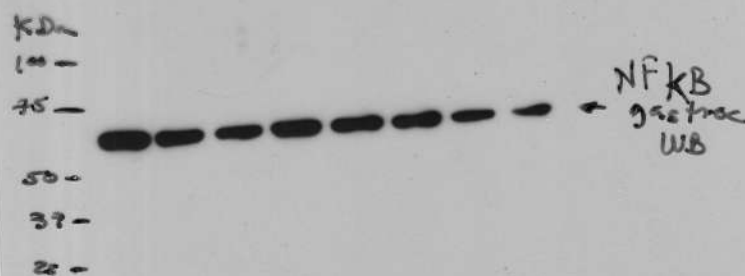

Aged rats project GAPDH-WB

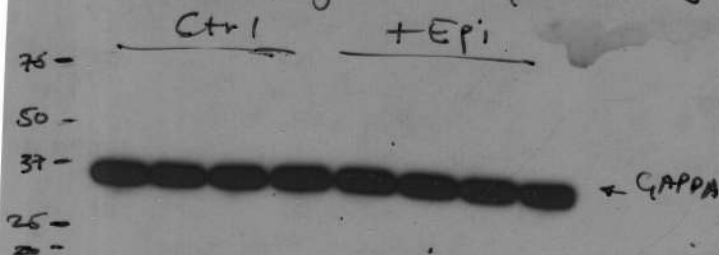

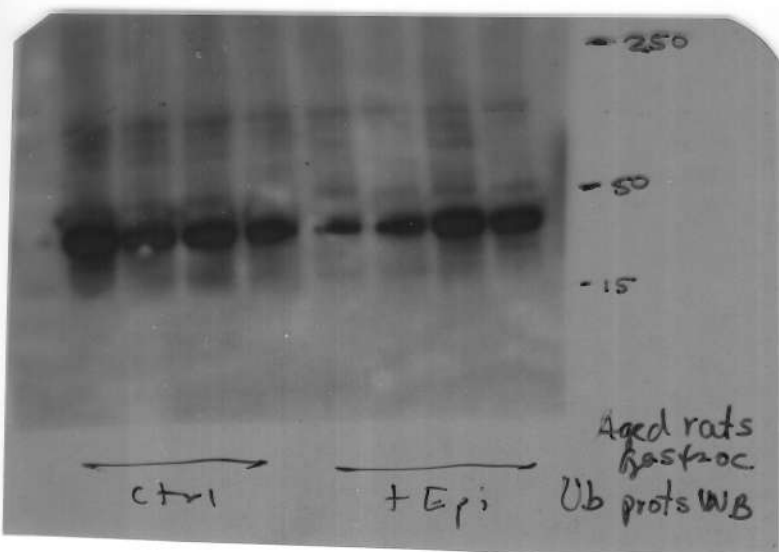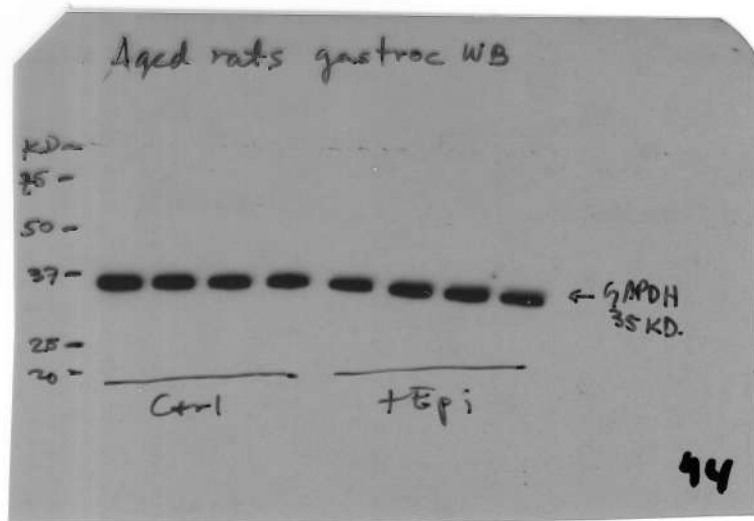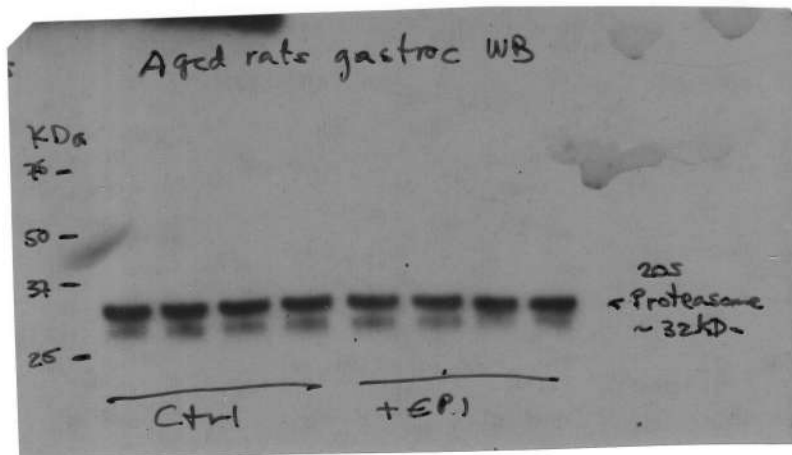

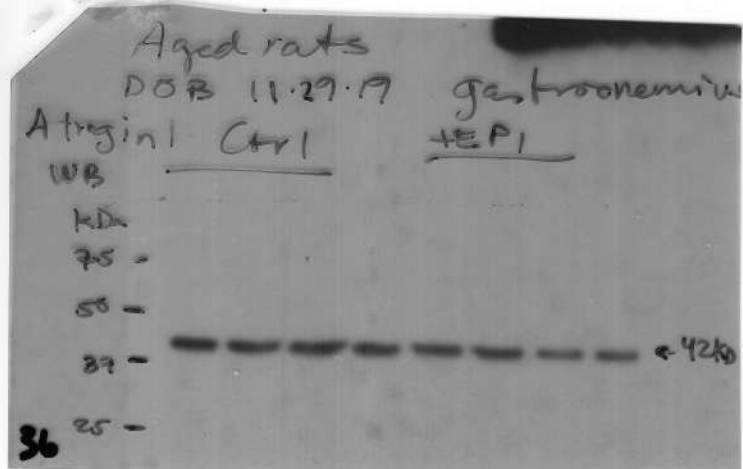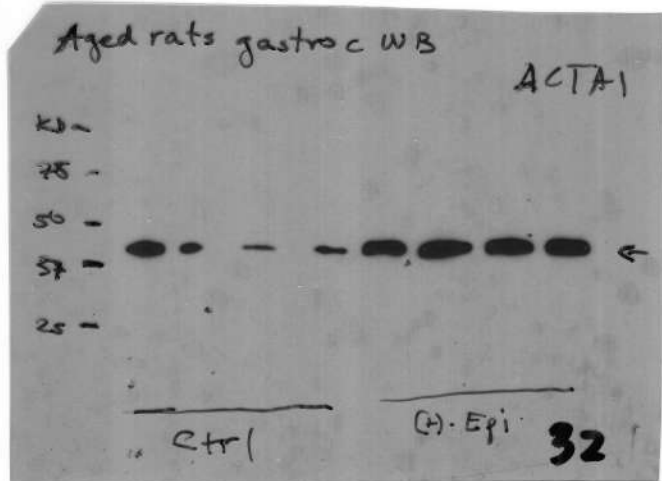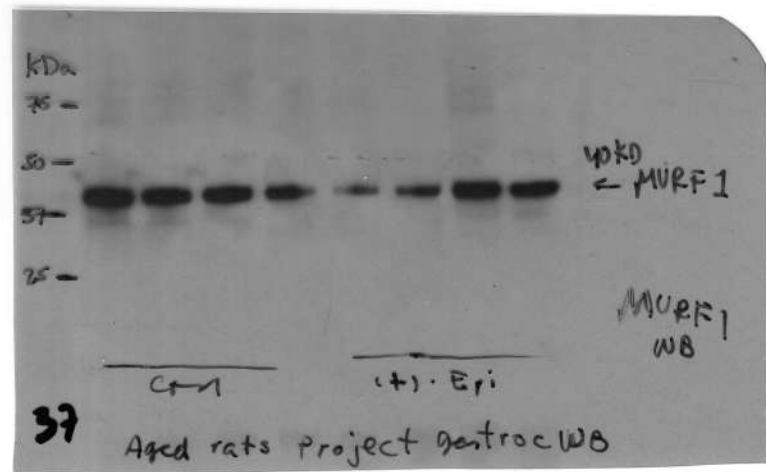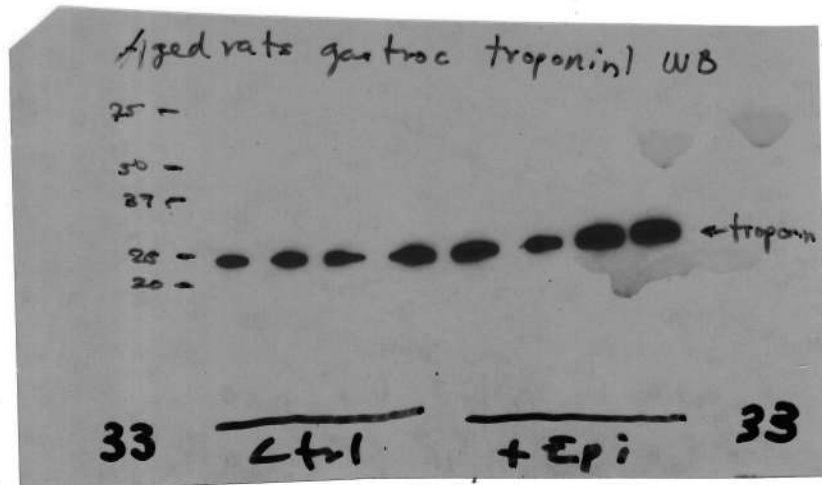

Aged rats DOB 11-29-19  
gastrocnemius WB

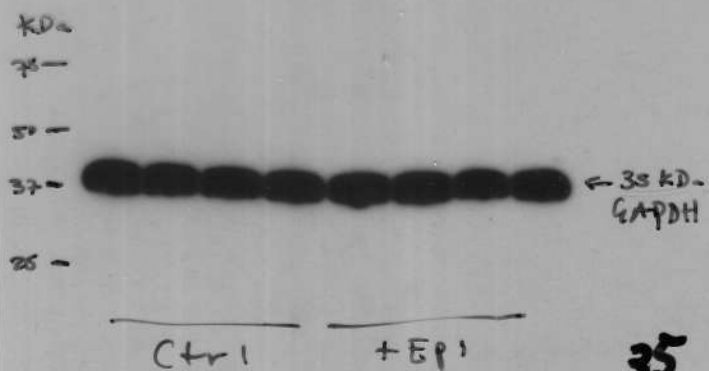

Supplement: d3fo04004f1.pdf [file d3fo04004f1.pdf]
